# Supplementary material
Source: PubMed Central journal article supplement (PMC6958044)
Supplement: ijcep0011-0956-f3.pdf [file ijcep0011-0956-f3.pdf]

## Survival of adenomyosis and endometrial carcinoma patients

**Table S1.** The characteristics of the surgical procedures

|                               | Total<br>N = 1584 | With Adenomyosis<br>N = 150 | Without Adenomyosis<br>N = 1434 | $\chi^2$ | <i>P</i> |
|-------------------------------|-------------------|-----------------------------|---------------------------------|----------|----------|
| Hysterectomy type             |                   |                             |                                 |          |          |
| Adbominal/vaginal             | 56.50%            | 45.33%                      | 57.67%                          | 0.501    | 0.479    |
| Laparoscopic                  | 43.5%             | 54.67%                      | 42.33%                          |          |          |
| Hysterectomy                  |                   |                             |                                 |          |          |
| Radical Hysterectomy          | 2.53%             | 1.33%                       | 2.65%                           | 5.433    | 0.066    |
| Modified radical hysterectomy | 7.64%             | 3.33%                       | 8.09%                           |          |          |
| Adnexectomy                   |                   |                             |                                 |          |          |
| Yes                           | 99.24%            | 99.33%                      | 199.23%                         | 0.018    | 0.893    |
| No                            | 0.76%             | 0.67%                       | 0.77%                           |          |          |
| Pelvic lymph node excision    |                   |                             |                                 |          |          |
| Yes                           | 89.14%            | 90%                         | 89.05%                          | 0.126    | 0.722    |
| No                            | 10.86%            | 10%                         | 10.95%                          |          |          |
| Aortic lymph node excision    |                   |                             |                                 |          |          |
| Yes                           | 56.76%            | 64%                         | 55.93%                          | 3.604    | 0.058    |
| No                            | 43.24%            | 36%                         | 44.07%                          |          |          |
| Number of LN                  |                   |                             |                                 |          |          |
| Median                        | 20                | 20                          | 20                              |          | 0.514    |
